# Supplementary material
Source: PubMed Central journal article supplement (PMC3699422)

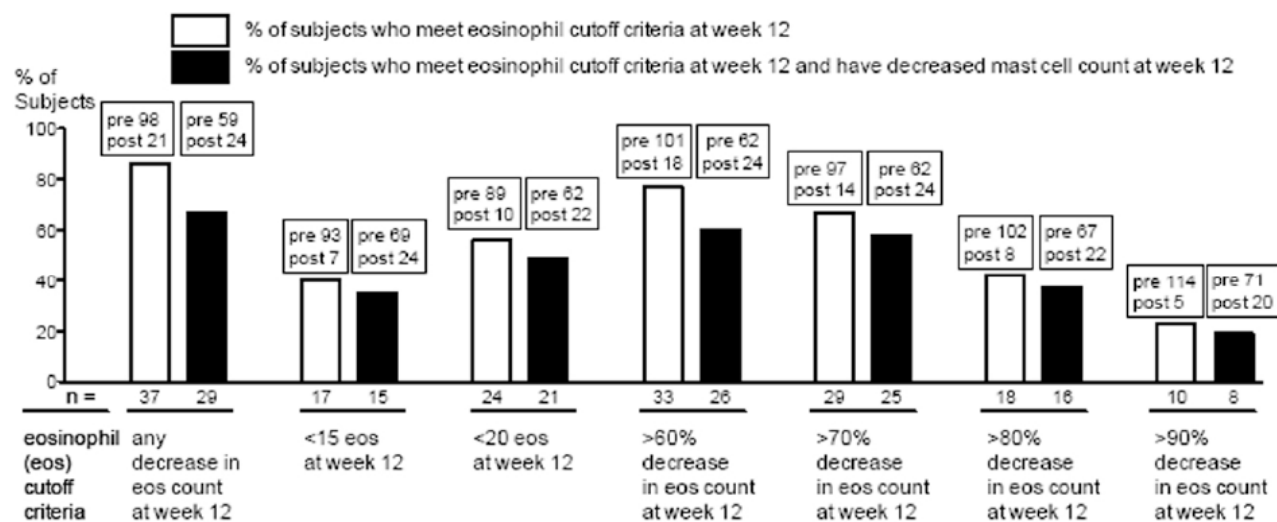

Supplemental Figure 1

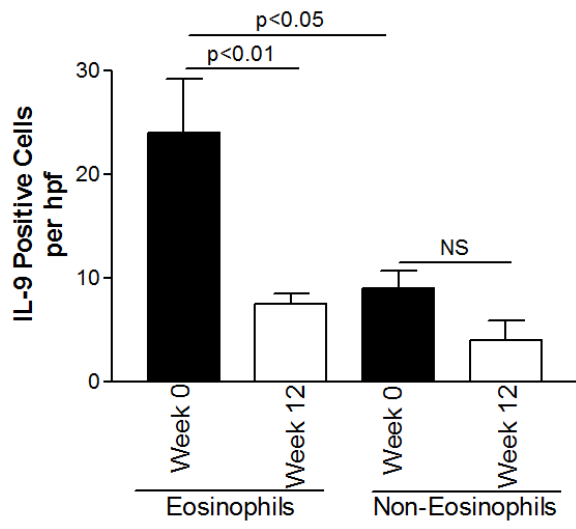

Supplemental Figure 2

Supplement: NIHMS475591-supplement-01.pdf [file NIHMS475591-supplement-01.pdf]
